# Supplementary material
Source: PubMed Central journal article supplement (PMC7524609)
Supplement: NIHMS1626772-supplement-1.pdf [file NIHMS1626772-supplement-1.pdf]

**Supplementary table 1** – Pre-operative Cox-regression model predicting biochemical recurrence after surgery adjusting for factors included in the Kattan nomogram (Model1: clinical stage, PSA, primary and secondary Gleason at biopsy) and in the D'Amico risk classification (Model 2: clinical stage, PSA, Gleason sum at biopsy), including all patients with available biopsy data (N=394)

|                    | Model 1 |             |         | Model 2 |             |         |
|--------------------|---------|-------------|---------|---------|-------------|---------|
|                    | HR      | 95% CI      | p-value | HR      | 95% CI      | p-value |
| <b>mpMRI score</b> |         |             |         |         |             |         |
| Likert 1-2 vs. 3   | 1.33    | 0.16, 11.36 | 0.3     | 2.76    | 0.33, 22.98 | 0.2     |
| Likert 1-2 vs. 4   | 1.83    | 0.24, 13.67 |         | 3.36    | 0.46, 24.60 |         |
| Likert 1-2 vs. 5   | 2.66    | 0.35, 20.11 |         | 4.99    | 0.68, 36.82 |         |

Keys: mpMRI score= multiparametric magnetic resonance imaging
